# Supplementary material for: Solar radiometer sensing of multi-year aerosol features over a tropical urban station: direct-Sun and inversion products
Source: Copernicus journal article supplement (doi:10.5194/amt-13-5569-2020), 2020-10-20
Supplement: Supplementary file 1 [file amt-13-5569-2020-supplement.pdf]

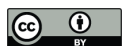

*Supplement of*

## **Solar radiometer sensing of multi-year aerosol features over a tropical urban station: direct-Sun and inversion products**

**Katta Vijayakumar et al.**

*Correspondence to:* Panuganti C. S. Devara ([pcsdevara@ggn.amity.edu](mailto:pcsdevara@ggn.amity.edu))

The copyright of individual parts of the supplement might differ from the CC BY 4.0 License.

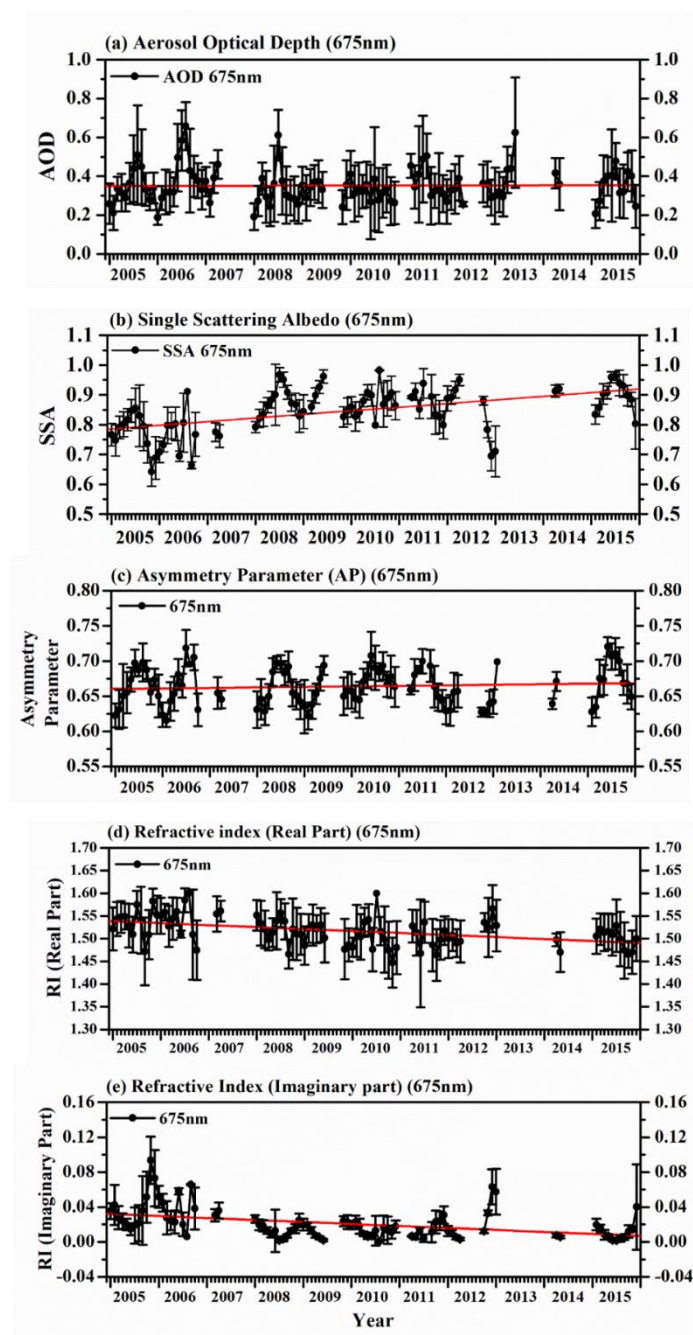

**Figure S1.** Long-term trends in aerosol products at 675 nm.

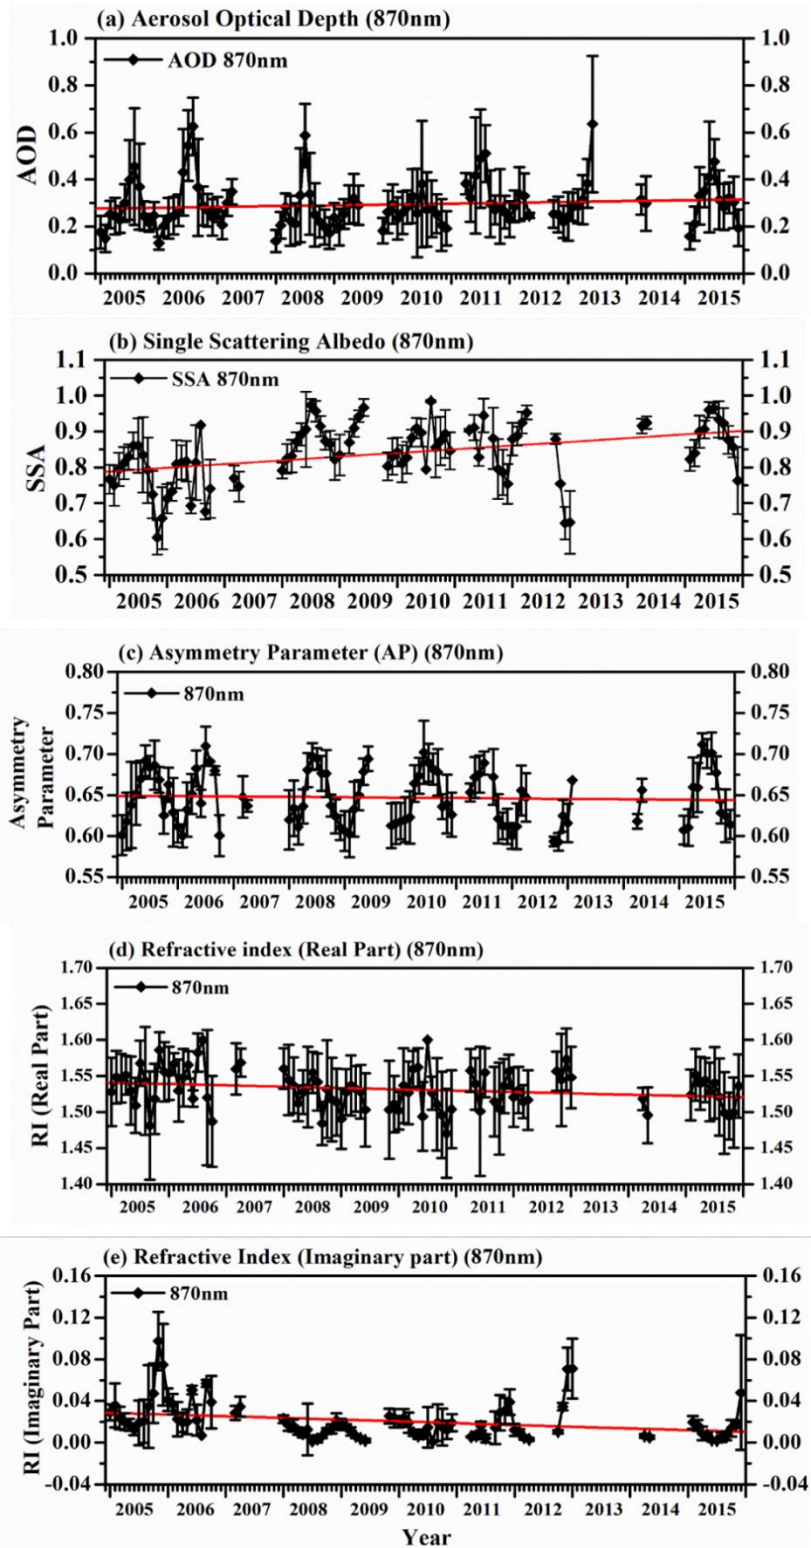

**Figure S2.** Long-term trends in aerosol products at 870 nm.

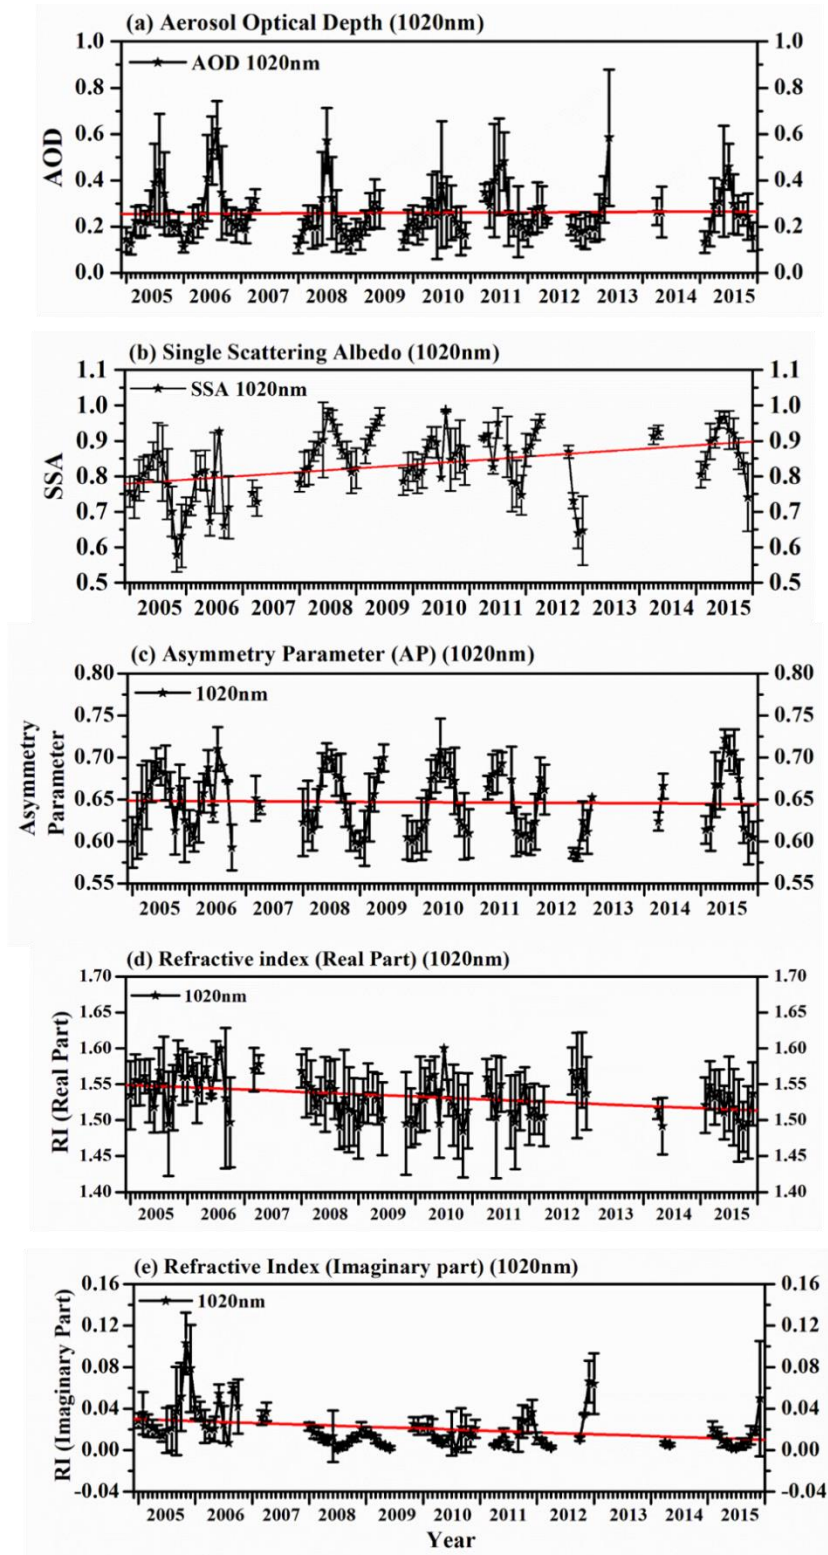

**Figure S3.** Long-term trends in aerosol products at 1020 nm.
